1 **Low-pathogenic virus induced immunity against TBEV protects mice from disease but**  
2 **not from virus entry into the CNS**

3 Monique Petry<sup>1</sup>, Martin Palus<sup>2,3</sup>, Eva Leitzen<sup>4</sup>, Johanna Gracia Mitterreiter<sup>5</sup>, Bei Huang<sup>4</sup>,  
4 Andrea Kröger<sup>6,7,8</sup>, Georges M.G.M Verjans<sup>9</sup>, Wolfgang Baumgärtner<sup>4</sup>, Guus F.  
5 Rimmelzwaan<sup>1</sup>, Daniel Růžek<sup>2,3</sup>, Albert Osterhaus<sup>1</sup>, Chittappen Kandiyil Prajeeth<sup>1\*</sup>

6 Author affiliations

7 <sup>1</sup> Research Center for Emerging Infections and Zoonoses, University of Veterinary Medicine Hannover,  
8 Foundation, Bünteweg 17, Hannover 30559, Germany.

9 <sup>2</sup> Veterinary Research Institute, Hudcova 70, CZ-62100, Brno, Czech Republic

10 <sup>3</sup> Institute of Parasitology, Biology Centre of Czech Academy of Science, Branisovska 31, CZ-37005,  
11 Ceske Budejovice, Czech Republic

12 <sup>4</sup> Department of Pathology, University of Veterinary Medicine Hannover, Foundation, Bünteweg 17,  
13 Hannover 30559, Germany

14 <sup>5</sup> Department of Virology, Paul-Ehrlich-Institut, Langen, Germany

15 <sup>6</sup> Innate Immunity and Infection, Helmholtz Centre for Infection Research, 38124, Braunschweig,  
16 Germany

17 <sup>7</sup> Institute of Medical Microbiology and Hospital Hygiene, Otto-von-Guericke University, Leipziger  
18 Strasse 44, D-39120, Magdeburg, Germany

19 <sup>8</sup> Center of Behavioral Brain Sciences, Otto-von-Guericke University, 39120, Magdeburg, Germany

20 <sup>9</sup> Department of Viroscience, Erasmus Medical Center Dr. Molewaterplein 50, 3015GE Rotterdam, The  
21 Netherlands

22

23 \* Correspondence to

24 Dr. Chittappen Kandiyil Prajeeth

25 e-mail: [Prajeeth.chittappen.kandiyil@tiho-hannover.de](mailto:Prajeeth.chittappen.kandiyil@tiho-hannover.de)

26

## 27 **Abstract**

28 Tick-borne encephalitis virus (TBEV) is a leading cause of vector-borne viral encephalitis with  
29 expanding endemic regions across Europe. Although currently used inactivated whole virus  
30 vaccines are effective, vaccination breakthroughs have been reported for which the reasons are  
31 unclear. In this study we tested in mice the efficacy of pre-infection with a closely related low-  
32 virulent flavivirus, Langat virus (LGTV strain TP21), or a naturally avirulent TBEV strain  
33 (TBEV-280) in providing protection against lethal infection with the highly virulent TBEV  
34 strain TBEV-Hypr (referred to as TBEV-Hypr). LGTV has been evaluated as an experimental  
35 live vaccine against TBE, but further development was abandoned due to too high residual  
36 pathogenicity of a LGTV-based vaccine. Here we show that prior infection with TP21 or  
37 TBEV-280 is efficient in protecting mice from lethal TBEV-Hypr challenge. Histopathological  
38 analysis of brains from non-immunized control mice revealed neuronal TBEV infection and  
39 necrosis. Neuroinflammation, gliosis and neuronal necrosis was however also observed in some  
40 of the TP21 and TBEV-280 pre-infected mice although at reduced frequency as compared to  
41 the non-immunized TBEV-Hypr infected control mice. Interestingly, qPCR detected the  
42 presence of viral RNA in the brains and spinal cord of both TP21 and TBEV-280 immunized  
43 mice after TBEV-Hypr challenge, but significantly reduced compared to mock-immunized  
44 mice. Our results indicate that although TBEV-Hypr infection is effectively controlled in the  
45 periphery upon immunization with low-virulent LGTV or naturally avirulent TBEV-280, it may  
46 still enter the CNS of these animals. These findings improve our understanding of potential  
47 causes for vaccine failure in individuals vaccinated with TBE vaccines.

## 48 **Introduction**

49 Tick-borne encephalitis virus (TBEV) is an enveloped virus belonging to the family  
50 *Flaviviridae* which contains several other vector-transmitted viruses such as West Nile virus,  
51 yellow fever virus, dengue virus, Japanese encephalitis virus and Zika virus (ZIKV), which all

52 may cause life threatening conditions in humans (1). TBEV is a major cause of concern in  
53 Europe and Asia with currently expanding endemic areas (2). TBEV is primarily transmitted  
54 by a tick-bite of Ixodes species, which can lead to strain-dependent outcome of illness (3,4).  
55 The clinical course of infections caused by TBEV strains circulating in Europe often shows a  
56 biphasic pattern. Approximately 7-14 days after infection, first flu-like symptoms may appear.  
57 After an asymptomatic phase, 20-30% of the patients develop a second phase with headache,  
58 high fever, and neurological symptoms as a consequence of severe meningitis and  
59 meningoencephalomyelitis. Of these patients, 2% exhibit long-lasting neurological sequelae  
60 (5,6). Preventive vaccination is the only available specific intervention method for TBE to date.  
61 Current TBEV vaccines are based on formalin inactivated whole virus preparations, which have  
62 proven to be effective in conferring temporary protection. Therefore repeated vaccinations are  
63 needed to induce satisfactory immunity with booster doses being required every 5-10 years (6–  
64 9). Live attenuated vaccines have been proven to confer better protection, nevertheless  
65 associated safety risks have discouraged their usage (10,11). LGTV, a naturally occurring low-  
66 virulent flavivirus, that has high amino acid sequence identity with TBEV (~80%), has shown  
67 potential as a live attenuated vaccine candidate. In Russia LGTV was used in 1970s to vaccinate  
68 against TBE, which was regarded highly successful until among vaccinees cases displaying  
69 neurological symptoms (about 1:20.000) were observed (2,12–15). Apparently, this LGTV-  
70 based vaccine was under-attenuated. Protection against TBEV and other flaviviruses in the  
71 periphery is largely mediated by virus-specific antibodies. In contrast, virus control within the  
72 central nervous system (CNS) is dependent on the interplay between infiltrating virus specific  
73 T cell and CNS cells. It has been shown that this interaction may have both beneficial and  
74 detrimental effects (16–18). Investigations into the pathogenesis of TBE in patients revealed  
75 that granzyme B releasing T cells and microglia cells / macrophages contribute to the tissue  
76 damage after infection, resulting in neuronal death and astrogliosis (19). It was recently shown  
77 that even low dosage LGTV infection in mice may result in astrogliosis and microglia activation

78 in the hippocampus, suggesting that infection with non-lethal doses of flaviviruses can indeed  
79 lead to histopathological changes in the brain (20).

80 To gain more insights in live vaccine induced protective immunity against TBE, we studied the  
81 efficacy of LGTV and naturally avirulent member of the TBEV serogroup (TBEV-280; a strain  
82 closely related to another naturally avirulent and well-characterized strain TBEV-263 (21)) in  
83 conferring protection against challenge with highly pathogenic TBEV strain in mice. Our  
84 findings show the potential of TP21 and TBEV-280 in providing protection against infection  
85 with the highly pathogenic TBEV-Hypr strain and advance our understanding of mechanisms  
86 within the CNS that may be involved in vaccination breakthroughs.

## 87 **Results**

### 88 *TP21 and TBEV-280 immunization protects mice from lethal TBEV-Hypr infection*

89 First, we tested the efficacy of immunity induced by pre-immunization with TP21 or TBEV-  
90 280 to confer protection against lethal TBEV-Hypr infection. As demonstrated in Figure 1, all  
91 mock-treated mice challenged with TBEV-Hypr started showing clinical signs from 7 dpi  
92 onward with body weight loss accompanied by signs of weakness, reduced activity, pilo-  
93 erection, kyphosis, and lethargy, often combined with neurological indicators of ataxia and  
94 paresis of hind legs. Nearly 50% of mice attained clinical scores corresponding to humane  
95 endpoint at 8 dpi and the rest had to be euthanized due to severe disease by 10 dpi. Notably, all  
96 mice that were immunized with TP21 or TBEV-280 were protected from developing clinical  
97 signs and survived lethal TBEV infection until study endpoint (14 dpi) with no notable changes  
98 in the body weights. These results show that pre-immunization with TP21 or TBEV-280 is  
99 effective in inducing immunity in mice, which conferred protection from clinical and lethal  
100 TBEV infection.

### 101 *Effect of TP21 and TBEV-280 immunization on TBEV-Hypr replication in organs*

102 To gain insight into the virus control in immunized mice, we compared distribution of TBEV-  
103 Hypr in peripheral organs and in the CNS of the mock-treated, TP21 or TBEV-280 immunized  
104 mice after subsequently infected with TBEV-Hypr. As assessed by qPCR analysis designed to  
105 detect TBEV RNA, high copy numbers of viral RNA were found in the spleen and brain of  
106 mock-immunized mice that were sacrificed between 8-10dpi due to high clinical scores (Figure  
107 2A). Furthermore, neuro-tropism and ability of TBEV-Hypr to predominantly replicate in  
108 neural tissue was evident from highest virus load observed in brains as compared to spleens of  
109 control mice (Figure 2A). At the study endpoint (14dpi), viral RNA was not detected in the  
110 spleens of any of the mice that experienced a prior immunization with TP21 or TBEV-280,  
111 which shows effective protection of peripheral organs from virus replication. In contrast,  
112 significant numbers of viral RNA copies were detected in the brains of some of the TP21 and  
113 all of the TBEV-280 pre-immunized mice (Figure 2A). However, viral copy numbers detected  
114 in these mice were significantly lower than those of mock control mice. Similar observations  
115 were made by qPCR analysis of the spinal cords (Supplementary Figure S1). TBEV primers  
116 used in this assay do not detect LGTV RNA at numbers less than  $10^5$  copies (data not shown).  
117 Since viral copy numbers detected in LGTV immunized mice are below detection limit we can  
118 confirm that only TBEV RNA is detected in these mice. Immunostaining of brain sections for  
119 TBEV antigen confirmed presence of TBEV-Hypr infected cells across different regions of  
120 brains of mock control mice. Cerebral cortex, thalamus, hypothalamus and pons appeared to be  
121 the regions with highest viral loads (Figure 2B-C). Interestingly, no TBEV antigen was detected  
122 in TP21 or TBEV-280 immunized mouse brains (Figure 2D-E). Taken together these results  
123 confirm that TP21 and TBEV-280 immunization qPCR positive induces protective immune  
124 response against TBEV-Hypr and effectively keeps virus replication and spread under control.  
125 Apparently, virus escaping from peripheral immunity may enter the CNS and replicate there  
126 before being cleared by local inflammatory or immune mechanisms.

127 *TBEV infects neurons*

128 Immunofluorescence staining for TBEV antigen of brain sections from control, TBEV-Hypr-  
129 infected mice revealed high numbers of infected cells across different brain regions. Based on  
130 location and morphology, most of the infected cells appeared to be neurons (Figure 3A-B), as  
131 has been reported previously (22,23). However, to further investigate whether major glial cell  
132 types such as microglia and astrocytes could also constitute a target of TBEV, double labeling  
133 of brain sections using antibodies targeting TBEV antigen and microglia/macrophages (Iba-1<sup>+</sup>)  
134 or astrocytes (GFAP<sup>+</sup>) was performed. Interestingly, none of the regions that were screened  
135 displayed astrocytes (GFAP<sup>+</sup> cells) that co-localized with TBEV antigen (Figure 3C-D).  
136 Largely, microglia/macrophage (Iba-1<sup>+</sup> cells) also failed to show co-localized TBEV antigen.  
137 However, in some areas of cerebral cortex and midbrain of single TBEV-Hypr infected control  
138 mice we detected Iba-1<sup>+</sup> cells co-stained with TBEV antigen (Figure 3E-F). Collectively these  
139 results confirm that neurons constitute the primary target of TBEV infection.

140 *Marked neuronal necrosis observed after TBEV-Hypr infection in mock control mice*

141 The results so far indicate that TBEV infects and replicate within neurons upon entering the  
142 CNS. Histopathological analysis of HE stained brain sections revealed significant neuronal  
143 necrosis in mock immunized mice that were challenged with TBEV-Hypr (Figure 4A-B). The  
144 extent of neuronal damage was assessed on a scale of 3 based on the presence of single scattered  
145 necrotic neurons per HPF (score 1) or greater than 30% affected neurons per HPF (score 3) in  
146 the regions evaluated. Neuronal damage was more prominent in the olfactory bulb, cerebral  
147 cortex and midbrain regions of heavily infected brains of mock treated mice. Interestingly,  
148 neuronal necrosis was also detected in thalamus, hypothalamus and pons of some of the TP21  
149 immunized mice and occasionally in the cerebral cortex of TBEV-280 immunized mice (Figure  
150 4C and Supplementary Figure S2). This indicates that the TBEV specific immune response

151 induced by TP21 and TBEV-280 immunization protects mice from clinical signs but does not  
152 fully protect all immunized mice from neuronal damage.

### 153 *Inflammation and gliosis in the brain*

154 Neuroinfection often results in extensive inflammation within the CNS which is usually  
155 characterized by perivascular infiltrates (PVI) of recruited peripheral inflammatory cells as well  
156 as hypertrophy and hyperplasia of local glial cells (gliosis). Such changes are not observed in  
157 brain of naïve mice. Examination of HE stained brain sections revealed significantly more PVI  
158 of mononuclear cells across different regions of brains of mock- immunized mice compared to  
159 TP21- and TBEV-280- immunized mice (Figure 5 & Supplementary Figure S3). Similarly,  
160 areas of gliosis were more prominent in mock immunized mice than in TP21 and TBEV-280  
161 immunized mice (Figure 6 and Supplementary Figure S4), in line with the attenuated course of  
162 disease after immunization. Interestingly, inflammatory infiltrates as well as multifocal, mild  
163 accumulation of glial cells were also detected within the brains of TP21 and TBEV-280  
164 immunized mice. This again shows that TBEV possibly gained access to the CNS despite the  
165 presence of peripheral protective immunity and triggers neuroinflammation.

### 166 **Discussion**

167 In the present study, we have shown that immunization of mice with LGTV, a closely related  
168 low-virulent flavivirus, or a naturally avirulent TBEV strain (TBEV-280) provided protective  
169 immunity in mice against symptomatic and lethal infection with TBEV-Hypr strain of TBEV.  
170 Interestingly, traces of viral RNA and signs of neuroinflammation were found in the brains of  
171 LGTV and TBEV-280 immunized mice that did not display any clinical signs upon lethal  
172 TBEV-Hypr challenge. This is of particular interest in the light of breakthrough TBE that have  
173 been reported in vaccinated individuals (24,25).

174 Neuronal cells are regarded as primary targets of TBEV (22,23). Accordingly, in the absence  
175 of vaccine-induced protective immunity, high numbers of infected neurons were detected by  
176 immunostaining in TBEV-Hypr infected mice. As we could not detect viral antigen within  
177 neurons of immunized mice, our initial assumption was that immune response induced by  
178 LGTV and TBEV-280 pre-immunization effectively cleared TBEV-Hypr from the periphery  
179 and prevented its spread into the CNS. However, detailed qPCR analyses of brain and spinal  
180 cord from these mice reflected a different outcome. Indeed, the average viral RNA copy number  
181 detected in TP21 or TBEV-280 immunized mice were several folds lower when compared to  
182 the numbers detected in mock immunized mice. The observed viral RNA copy numbers by  
183 qPCR in the brains of the TP21 or TBEV-280 immunized mice (to the order of  $10^5$  genome  
184 copies/g) were significantly higher than could be expected without active virus TBEV  
185 replication. Hence, the most likely explanation for the presence of high viral RNA copy  
186 numbers in brains and spinal cords of the immunized mice is that TBEV-Hypr is able to enter  
187 the CNS of immunized mice and probably replicate within the neural tissue. This hypothesis is  
188 furthermore supported by the presence of inflammatory (PVI) and reactive (gliosis) changes  
189 within the CNS of vaccinated mice, which both constitute frequent findings during and after  
190 neuroinfection (18). Besides neurons, some studies have demonstrated TBEV infection of  
191 astrocytes (23,26,27). Furthermore, it has been shown that TBEV can infect and survive in rat  
192 and human astrocytes for several days without affecting each other's viability (26,27).  
193 However, co-staining of brain tissue sections did not provide evidence of TBEV antigen within  
194 astrocytes either in mock-, LGTV- or TBEV-280- immunized mice after challenge. Similarly,  
195 only isolated microglia cells in certain brain regions in mock immunized mice showed co-  
196 labeling of Iba-1 with TBEV antigen. Microglia are highly efficient phagocytes and actively  
197 scavenge cell debris in the event of tissue damage. Therefore, it remains unclear whether  
198 detected signal resulted from infection of Iba1-positive cells or from phagocytosis. There is  
199 evidence that neurotropic flaviviruses can influence the behavior of microglia and astrocytes



200 and either assist in viral clearance or augment neuropathogenesis by producing toxic  
201 neuroinflammatory mediators (17,20,28–30). To avoid any permanent damage, inflammation  
202 within the CNS is highly regulated and is primarily mediated by microglia and astrocytes. In  
203 response to any perturbation caused within the CNS, these glial cells proliferate and migrate to  
204 the affected areas and provide neuroinflammatory mediators and neurotrophic factors to limit  
205 the damage (31–33). This phenomenon coined reactive gliosis (34) is characteristic of neural  
206 tissue damage caused by injury or infection, which could be also have occurred within the  
207 present study. In mock immunized mice after TBEV-Hypr challenge, we also observed gliosis,  
208 particularly in those areas with increased viral load. Interestingly, mild areas of gliosis have  
209 also been observed in certain brain regions of the TP21 and TBEV-280 immunized mice after  
210 TBEV-Hypr challenge, indicating reactive changes within CNS even after immunization. Since  
211 we could not detect TBEV antigen in these brains it is difficult to conclude that the areas with  
212 gliosis directly correspond to those with assumed previous virus infection. Taken together these  
213 findings are highly indicative of TBEV gaining access to the CNS and triggering inflammation  
214 despite of pre-existing TP21 or TBEV-280 induced immunity. We have observed the presence  
215 of PVI in cerebral cortex, thalamus, hypothalamus and midbrain regions of mock immunized  
216 mice. In contrast, PVIs were limited to certain brain regions in immunized mice. This again  
217 may reflect differences in virus distribution within the CNS of mock immunized and immunized  
218 mice.

219 Extensive neuronal necrosis was found in infected brains of mock immunized mice. There was  
220 severe loss of neurons especially in the olfactory bulb, cerebral cortex and midbrain regions  
221 accompanied by detection of numerous neurons staining positive for TBEV antigen by IF as  
222 well as inflammatory and reactive changes. However, it is not clear if the observed neuronal  
223 damage represents a direct effect of virus infection or a secondary consequence of  
224 inflammation. It has been shown for other flaviviruses that infection and virus replication can

225 trigger apoptosis and necrosis in neurons (19,35–40). Similarly, inflammation as a consequence  
226 of neuroinfection can also cause substantial neuronal loss (41,42).

227 Probably the most intriguing finding from this study is the detection of neuronal necrosis  
228 combined with inflammation and gliosis despite of vaccine-induced protective immunity to  
229 TBEV in some mice. This phenomenon was more prominent in TP21 than in TBEV-280  
230 immunized mice. This is of special interest, considering breakthrough TBE in vaccinated  
231 individuals. The observation that TBEV may still enter the CNS despite vaccine induced  
232 protective immunity while causing inflammation and neuronal damage may at least in part  
233 explain vaccination breakthroughs in TBE vaccinated individuals.

234 In conclusion, this study demonstrates for the first time the presence of TBEV in the CNS of  
235 immunized mice that are protected from lethal or clinically manifest infection. However,  
236 absence of detectable TBEV antigen in these brains via IF hints at an important role of local  
237 inflammatory mediators in checking the virus spread within the CNS in the event virus escapes  
238 host immune response in the periphery. Nonetheless, the actual cause of the neuronal necrosis  
239 in immunized mice remains unclear. Whether this is caused by virus infection directly or a  
240 consequence of subsequent inflammation or even the action of infiltrating virus-specific T cells  
241 remains a matter of further investigation. Recently Garber *et al.* demonstrated that ZIKV  
242 specific T cells through microglia mediate neuronal loss and hence result in cognitive  
243 dysfunction (17). Furthermore, CD8<sup>+</sup> T cells that clear infected cells also cause neuronal  
244 damage (18,19,43). Finally, it is tempting to speculate whether subtle neuronal necrosis as  
245 observed in immunized mice is the reflection of a broader challenge of raising sufficient  
246 immune mediated protection of the CNS from TBEV invasion, which may also be the basis of  
247 current human vaccination failures.

## 248 **Material and Methods**

249 *Mice and ethics*

250 Six-week old female C57BL/6J0laHsd (BL6) mice were obtained from Envigo, Inc. (Indiana,  
251 USA). Mice were housed in isocage systems with individually ventilated cages. Experiments  
252 were done in biosafety level 3 laboratories of the Institute of Parasitology, Biology Center of  
253 Czech Academy of Sciences, České Budějovice, Czech Republic. The protocol was approved  
254 by the Departmental Expert Committee for the Approval of Projects of Experiments on Animals  
255 of the Czech Academy of Sciences and the Committee on the Ethics of Animal Experimentation  
256 at the Institute of Parasitology (permit No. 29/2016). All experiments were done in accordance  
257 with Czech national law guidelines (animal Welfare Act No. 246/1992 Col.) and European  
258 Union guidelines for work with animals.

#### 259 *Viruses*

260 LGTV strain TP21 (referred to as TP21) was isolated 1956 from a pool of hard ticks (*Ixodes*  
261 *granulatus*) of forest rats near Kuala Lumpur, Malaysia (44). TP21 was grown in Vero B4 and  
262 Vero E6 cells and titers were determined by TCID<sub>50</sub> assay on Vero E6 cells. Virus was  
263 provided the Department of Molecular Immunology, Helmholtz Centre for Infection Research,  
264 Braunschweig, Germany. Highly virulent TBEV strain TBEV-Hypr (further on described as  
265 TBEV-Hypr) was isolated in 1953 from a diseased child in Brno (former Czechoslovakia). The  
266 virus was passaged eight times in suckling mice brains before its use in this study. A naturally  
267 avirulent strain TBEV-280 was isolated in 1987 from a pool of *I. ricinus* ticks near Kaplice  
268 (former Czechoslovakia). The virus was plaque-purified three times, and passaged three times  
269 in suckling mice brains, one time in UFK-NB4 cells and one times in SK-N-SH cells before its  
270 use in this study. TBEV titers were determined by plaque assay as described in (45). The TBEV  
271 strains were provided by the Collection of Arboviruses, Institute of Parasitology, Biology  
272 Centre of the Czech Academy of Sciences, České Budějovice, Czech Republic.

#### 273 *Immunization study*

274 Subcutaneous (s.c) administration of 500 pfu of TBEV-Hypr results in 100% lethality in mice.  
275 Here, we utilized this mouse model to test the efficacy of TP21 and TBEV-280 in providing  
276 protection against lethal TBEV-Hypr challenge. At 28 days prior to TBEV-Hypr challenge,  
277 mice were administered s.c with medium (mock), TP21 ( $10^4$  pfu) or TBEV-280 ( $10^4$  pfu).  
278 Following a s.c. challenge with 500 pfu of TBEV-Hypr, development of clinical signs in mice  
279 was monitored for a period of 14 days and when clinical score corresponding to humane  
280 endpoint was reached, they were sacrificed.

### 281 *RNA isolation and quantitative real-time PCR (qPCR)*

282 To determine viral loads in organs, half the brain, spinal cord and spleen were dissected,  
283 weighted and homogenized in AVL Buffer (Qiagen). RNA was isolated using QIAamp viral  
284 RNA Mini QC Kit (Qiagen) and the QIAcube machine. Viral load was quantified by Taq-Man  
285 qPCR using OneStep RT-PCR Kit (Qiagen) and AriaMx Real-time PCR Systems (Agilent).  
286 TBEV forward primer (5'-3' GGGCGGTTCTTGTCTCC), TBEV reverse primer (5'-3'  
287 ACACATCACCTCCTTGTCAGACT) and TBEV probe (5'-3'  
288 TGAGCCACCATCACCCAGACACA) were designed by (46). AriaMX software (version 1.5;  
289 Agilent) in combination with intraassay TBEV standard curve was used to analyse the data and  
290 viral copies were extrapolated by individual organ weight in RNA copies/gram.

### 291 *Histology*

292 Brains were cut midsagittal and fixed for 48 hours in 4% Histofix (Carl Roth). After fixation  
293 organs were stored in PBS till paraffin embedment and cut of serial sections on a microtome  
294 (2-3  $\mu$ m; Leica RM 2035; Leica Instruments GmbH, Nußloch, Germany). Sections were stained  
295 by hematoxylin and eosin (HE) and immunofluorescence (IF).

### 296 *Immunofluorescence*

297 IF was performed as described before (47). Briefly, sections of formalin-fixed, paraffin-  
 298 embedded brains were dewaxed and rehydrated using graded alcohols. For antigen retrieval,  
 299 sections were heated in a microwave oven (800 W) for 20 min in 0.01 M citrate buffer, followed  
 300 by application of inactivated goat serum or horse serum, respectively. Afterwards, sections were  
 301 incubated with primary antibodies (see Table 1) targeting TBEV E-protein (clone 1493) (48),  
 302 glial fibrillary acidic protein (GFAP, astrocytes) and ionized calcium-binding adapter molecule  
 303 (Iba-1, microglia/macrophages) overnight at 4°C. For detecting TBEV-infected astrocytes and  
 304 microglia, double labeling of TBEV E- protein with GFAP and Iba-1 was performed. Negative  
 305 control sections were incubated with equally diluted rabbit or mouse serum. For visualization  
 306 of antigen-antibody reactions, sections were treated with Alexa Fluor 488- or Cy3-labeled  
 307 secondary antibodies (1:200) for 1 hour at room temperature. Nuclei were stained with  
 308 bisbenzimidazole (Hoechst 33258, 0.01 % in methanol, 1:100; Sigma-Aldrich, Taufkirchen,  
 309 Germany) and mounted with fluorescence mounting medium (Dako Diagnostika, Hamburg,  
 310 Germany). Sections were evaluated with a fluorescence microscope (Keyence BZ-9000E,  
 311 Keyence Deutschland GmbH, Neu-Isenburg, Germany).

312 *Table 1. Antibodies and reagents of immunofluorescence*

|                    | target            | 1 <sup>st</sup> antibody<br>company | dilution | pre-<br>treatment | Blocking<br>serum | 2 <sup>nd</sup> antibody                                      |
|--------------------|-------------------|-------------------------------------|----------|-------------------|-------------------|---------------------------------------------------------------|
| Single<br>staining | TBEV E<br>protein | Clone 1493<br>Andreas<br>Niedrig    | 1:250    | Citrate<br>buffer | Horse             | Donkey-anti-mouse alexa<br>flour 488<br>(Dianova 715-546-150) |
| Double<br>staining | GFAP              | Dako Z0334                          | 1:400    | Citrate<br>buffer | Goat              | Goat-anti-rabbit-Cy3<br>(Dianova 111-165-144)                 |
|                    | TBEV E<br>protein | Clone 1493<br>Andreas<br>Niedrig    | 1:250    | Citrate<br>buffer | Goat              | Goat-anti-mouse alexa<br>flour 488<br>(Dianova 115-545-003)   |
| Double<br>staining | Iba-1             | FUJIFILM<br>011-27991               | 1:400    | Citrate<br>buffer | Horse             | Donkey-anti-goat-Cy3<br>(Dianova 705-165-147)                 |
|                    | TBEV E<br>protein | Clone 1493<br>Andreas<br>Niedrig    | 1:250    | Citrate<br>buffer | Horse             | Donkey-anti-mouse alexa<br>flour 488<br>(Dianova 715-546-150) |

313 *Histological evaluation*

314 HE stained slides were evaluated by semi-quantitative scoring of neuronal necrosis, gliosis and  
315 inflammation for individual brain regions. The applied scoring system included three  
316 categories. Neuronal necrosis scores ranged from 0 to 3 (0 normal; 1 single necrotic neurons, 2  
317 less than 30 % affected neurons; 3 more than 30 % affected neurons). Gliosis, interpreted as  
318 hyperplasia and hypertrophy of glial cells, ranged from 0 to 3 (0 normal; 1 multifocal, mild; 2  
319 multifocal, moderate; 3 multifocal, severe) and inflammation scores ranged from 0 to 3 (0  
320 normal; 1 single perivascular infiltrates; 2 2-3 layers of perivascular infiltrates; 3 more than 3  
321 layers of perivascular infiltrates). TBEV scoring ranged from 0 to 3 (1 <30 % positive cells, 2  
322 30-60 % positive cells; 3 >60 % positive cells). All scorings were performed using a defined  
323 area of high power fields (HPFs; 400x).

#### 324 *Statistics*

325 Data was analyzed by GraphPad Prism Software 9. Survival curves are displayed by Kaplan-  
326 Meier curves using log rank test. Body weights are expressed by mean  $\pm$  standard error (SD) in  
327 graphs and were analyzed using unpaired, two-tailed student's -t test. Differences between viral  
328 load or HE scorings were analyzed using Mann-Whitney *U* test unless described differently. A  
329 p-value of < 0.05 was considered significant and indicated by (\*).

330 **Acknowledgements:** We thank Prof. Matthias Niedrig former employee of the Department of  
331 Virology of the Robert-Koch-Institute Berlin, Germany (niedrigm@gmx.de) for providing the  
332 antibody against TBEV for these studies. We thank the Federal Ministry of Education and  
333 Research for funding this study within the TBENAGER grant for AO. This work was funded  
334 in part by the Alexander von Humboldt Foundation in the framework of the Alexander von  
335 Humboldt Professorship endowed by the German Federal Ministry of Education and Research.  
336 We thank the Deutsche Forschungsgemeinschaft (DFG, German Research Foundation) –  
337 398066876/GRK 2485/1, VIPER for funding parts of the study. We thank for a support from  
338 the Czech Science Foundation (grant No. 20-14325S to DR, and No. 20-30500S to MP).

## 339 References

- 340 1. Mandl CW, Ecker M, Holzmann H, Kunz C, Heinz FX. Infectious cDNA clones of tick-  
341 borne encephalitis virus European subtype prototypic strain Neudoerfl and high  
342 virulence strain Hypr. *J Gen Virol*. 1997;78(5):1049–57.
- 343 2. Gritsun TS, Lashkevich VA, Gould EA. Tick-borne encephalitis. *Antiviral Res*  
344 [Internet]. 2003;57(1–2):129–46.
- 345 3. Dai X, Shang G, Lu S, Yang J, Xu J. A new subtype of eastern tick-borne encephalitis  
346 virus discovered in Qinghai-Tibet Plateau, China. *Emerg Microbes Infect*. 2018;7(1):74.
- 347 4. Kovalev SY, Mukhacheva TA. Reconsidering the classification of tick-borne  
348 encephalitis virus within the Siberian subtype gives new insights into its evolutionary  
349 history. *Infect Genet Evol* [Internet]. 2017;55:159–65.
- 350 5. Blom K, Cuapio A, Sandberg JT, Varnaite R, Michaelsson J, Bjorkstrom NK, et al. Cell-  
351 Mediated Immune Responses and Immunopathogenesis of Human Tick-Borne  
352 Encephalitis Virus-Infection. *Front Immunol*. 2018;9:2174.
- 353 6. Růžek D, Dobler G, Mantke OD. Tick-borne encephalitis: Pathogenesis and clinical  
354 implications. *Travel Med Infect Dis* [Internet]. 2010;8(4):223–32.
- 355 7. Heinz FX, Holzmann H, Essl A, Kundi M. Field effectiveness of vaccination against  
356 tick-borne encephalitis. *Vaccine*. 2007;25(43):7559–67.
- 357 8. Kubinski M, Beicht J, Gerlach T, Volz A, Sutter G, Rimmelzwaan GF. Tick-borne  
358 encephalitis virus: A quest for better vaccines against a virus on the rise. *Vaccines*.  
359 2020;8(3):1–45.
- 360 9. Beran J, Lattanzi M, Xie F, Moraschini L, Galgani I. Second five-year follow-up after a  
361 booster vaccination against tick-borne encephalitis following different primary  
362 vaccination schedules demonstrates at least 10 years antibody persistence. *Vaccine*.  
363 2019;37(32):4623–9.
- 364 10. Minor PD. Live attenuated vaccines: Historical successes and current challenges.  
365 *Virology* [Internet]. 2015;479–480:379–92.
- 366 11. Seligman SJ, Gould EA. Live flavivirus vaccines: Reasons for caution. *Lancet* [Internet].  
367 2004;363(9426):2073–5.
- 368 12. Rumyantsev AA, Murphy BR, Pletnev AG. A tick-borne Langat virus mutant that is  
369 temperature sensitive and host range restricted in neuroblastoma cells and lacks  
370 neuroinvasiveness for immunodeficient mice. *J Virol*. 2006;80(3):1427–39.
- 371 13. Mitrova E, Mayer V. A live vaccine against tick-borne encephalitis; integrated studies,  
372 H. Histopathology of mice peripherally immunized with E5 “14” virus and challenged  
373 with virulent virus. *Acta Virol* [Internet]. 1975;3:219–28.
- 374 14. Mayer V, Pogady J, Starek M, Hrbka J. A live vaccine against tick borne encephalitis:  
375 integrated studies. III. Response of man to a single dose of the E5’14’ clone (Langat  
376 virus). *Acta Virol*. 1975;19(3):229–36.
- 377 15. Gritsun TS, Frolova T V., Pogodina V V., Lashkevich VA, Venugopal K, Gould EA.  
378 Nucleotide and deduced amino acid sequence of the envelope gene of the Vasilchenko  
379 strain of TBE virus; comparison with other flaviviruses. *Virus Res* [Internet].  
380 1993;27(2):201–9.

- 381 16. Turtle L, Bali T, Buxton G, Chib S, Chan S, Soni M, et al. Human T cell responses to  
382 Japanese encephalitis virus in health and disease. *J Exp Med*. 2016;213(7):1331–52.
- 383 17. Garber C, Soung A, Vollmer LL, Kanmogne M, Last A, Brown J, et al. T cells promote  
384 microglia-mediated synaptic elimination and cognitive dysfunction during recovery  
385 from neuropathogenic flaviviruses. *Nat Neurosci*. 2019;22(8):1276–88.
- 386 18. Růžek D, Salát J, Palus M, Gritsun TS, Gould EA, Dyková I, et al. CD8+ T-cells mediate  
387 immunopathology in tick-borne encephalitis. *Virology [Internet]*. 2009;384(1):1–6.
- 388 19. Gelpi E, Preusser M, Laggner U, Garzuly F, Holzmann H, Heinz FX, et al. Inflammatory  
389 response in human tick-borne encephalitis: analysis of postmortem brain tissue. *J*  
390 *Neurovirol [Internet]*. 2006;12(4):322–7.
- 391 20. Cornelius ADA, Hosseini S, Schreier S, Fritzsche D, Weichert L, Michaelsen-Preusse K,  
392 et al. Langkat virus infection affects hippocampal neuron morphology and function in  
393 mice without disease signs. *J Neuroinflammation*. 2020;17(1):278.
- 394 21. Růžek D, Gritsun TS, Forrester NL, Gould EA, Kopecký J, Golovchenko M, et al.  
395 Mutations in the NS2B and NS3 genes affect mouse neuroinvasiveness of a Western  
396 European field strain of tick-borne encephalitis virus. *Virology [Internet]*.  
397 2008;374(2):249–55.
- 398 22. Růžek D, Vancová M, Tesařová M, Ahantarig A, Kopecký J, Grubhoffer L.  
399 Morphological changes in human neural cells following tick-borne encephalitis virus  
400 infection. *J Gen Virol [Internet]*. 2009;90(7):1649–58.
- 401 23. Fares M, Cochet-Bernoin M, Gonzalez G, Montero-Menei CN, Blanchet O, Benchoua  
402 A, et al. Pathological modeling of TBEV infection reveals differential innate immune  
403 responses in human neurons and astrocytes that correlate with their susceptibility to  
404 infection. *J Neuroinflammation*. 2020;17:76.
- 405 24. Sendi P, Hirzel C, Pfister S, Ackermann-Gäumann R, Grandgirard D, Hewer E, et al.  
406 Fatal outcome of European tick-borne encephalitis after vaccine failure. *Front Neurol*.  
407 2017;8:119.
- 408 25. Andersson CR, Vene S, Insulander M, Lindquist L, Lundkvist Å, Günther G. Vaccine  
409 failures after active immunisation against tick-borne encephalitis. *Vaccine*.  
410 2010;28(16):2827–31.
- 411 26. Potokar M, Korva M, Jorgačevski J, Avšič-Županc T, Zorec R. Tick-Borne Encephalitis  
412 Virus Infects Rat Astrocytes but Does Not Affect Their Viability. *PLoS One*.  
413 2014;9(1):e86219.
- 414 27. Palus M, Bílý T, Elsterová J, Langhansová H, Salát J, Vancová M, et al. Infection and  
415 injury of human astrocytes by tick-borne encephalitis virus. *J Gen Virol*.  
416 2014;95(11):2411–26.
- 417 28. Myint KSA, Kipar A, Jarman RG, Gibbons R V., Perng GC, Flanagan B, et al.  
418 Neuropathogenesis of Japanese Encephalitis in a Primate Model. *PLoS Negl Trop Dis*.  
419 2014;8(8):e2980.
- 420 29. Ho C-Y, Ames HM, Tipton A, Vezina G, Liu JS, Scafidi J, et al. Differential neuronal  
421 susceptibility and apoptosis in congenital Zika virus infection. *Ann Neurol*.  
422 2017;82(1):121–7.
- 423 30. Pokorna Formanova P, Palus M, Salat J, Hönig V, Stefanik M, Svoboda P, et al. Changes



- 424 in cytokine and chemokine profiles in mouse serum and brain, and in human neural cells,  
425 upon tick-borne encephalitis virus infection. *J Neuroinflammation*. 2019;16(1).
- 426 31. Prajeeth CK, Kronisch J, Khoroshi R, Knier B, Toft-Hansen H, Gudi V, et al. Effectors  
427 of Th1 and Th17 cells act on astrocytes and augment their neuroinflammatory properties.  
428 *J Neuroinflammation*. 2017;14(1):204.
- 429 32. Detje CN, Lienenklaus S, Chhatbar C, Spanier J, Prajeeth CK, Soldner C, et al. Upon  
430 Intranasal Vesicular Stomatitis Virus Infection, Astrocytes in the Olfactory Bulb Are  
431 Important Interferon Beta Producers That Protect from Lethal Encephalitis. *J Virol*.  
432 2015;89(5):2731–8.
- 433 33. Weber E, Finsterbusch K, Lindquist R, Nair S, Lienenklaus S, Gekara NO, et al. Type I  
434 Interferon Protects Mice from Fatal Neurotropic Infection with Langat Virus by  
435 Systemic and Local Antiviral Responses. *J Virol*. 2014;88(21):12202–12.
- 436 34. Burda JE, Sofroniew M V. Reactive gliosis and the multicellular response to CNS  
437 damage and disease. *Neuron*. 2014;81(2):229–48.
- 438 35. Wang Q, Xin X, Wang T, Wan J, Ou Y, Yang Z, et al. Japanese Encephalitis Virus  
439 Induces Apoptosis and Encephalitis by Activating the PERK Pathway. *J Virol*.  
440 2019;93(17).
- 441 36. Chen Z, Wang X, Ashraf U, Zheng B, Ye J, Zhou D, et al. Activation of neuronal N-  
442 methyl-d-aspartate receptor plays a pivotal role in Japanese encephalitis virus-induced  
443 neuronal cell damage. *J Neuroinflammation*. 2018;15(1):238.
- 444 37. Leyssen P, Paeshuyse J, Charlier N, Van Lommel A, Drosten C, De Clercq E, et al.  
445 Impact of direct virus-induced neuronal dysfunction and immunological damage on the  
446 progression of flavivirus (Modoc) encephalitis in a murine model. *J Neurovirol*  
447 [Internet]. 2003;9(1):69–78.
- 448 38. Růžek D, Vancová M, Tesařová M, Ahantarig A, Kopecký J, Grubhoffer L.  
449 Morphological changes in human neural cells following tick-borne encephalitis virus  
450 infection. *J Gen Virol*. 2009;90(7):1649–58.
- 451 39. Maximova OA, Faucette LJ, Ward JM, Murphy BR, Pletnev AG. Cellular inflammatory  
452 response to flaviviruses in the central nervous system of a primate host. *J Histochem*  
453 *Cytochem*. 2009;57(10):973–89.
- 454 40. Prikhod'ko GG, Prikhod'ko EA, Cohen JI, Pletnev AG. Infection with Langat flavivirus  
455 or expression of the envelope protein induces apoptotic cell death. *Virology* [Internet].  
456 2001;286(2):328–35.
- 457 41. Ghoshal A, Das S, Ghosh S, Mishra MK, Sharma V, Koli P, et al. Proinflammatory  
458 mediators released by activated microglia induces neuronal death in Japanese  
459 encephalitis. *Glia*. 2007;55(5):483–96.
- 460 42. Chen CJ, Ou YC, Lin SY, Raung SL, Liao SL, Lai CY, et al. Glial activation involvement  
461 in neuronal death by Japanese encephalitis virus infection. *J Gen Virol*.  
462 2010;91(4):1028–37.
- 463 43. Shrestha B, Samuel MA, Diamond MS. CD8+ T Cells Require Perforin To Clear West  
464 Nile Virus from Infected Neurons. *J Virol*. 2006;80(1):119–29.
- 465 44. Gordon Smith CE. A virus resembling Russian spring-summer encephalitis virus from  
466 an ixodid tick in Malaya. *Nature* [Internet]. 1956;178(4533):581–2.

- 467 45. Palus M, Vojtíšková J, Salát J, Kopecký J, Grubhoffer L, Lipoldová M, et al. Mice with  
468 different susceptibility to tick-borne encephalitis virus infection show selective  
469 neutralizing antibody response and inflammatory reaction in the central nervous system.  
470 J Neuroinflammation [Internet]. 2013;10:1–13.
- 471 46. Schwaiger M, Cassinotti P. Development of a quantitative real-time RT-PCR assay with  
472 internal control for the laboratory detection of tick borne encephalitis virus (TBEV)  
473 RNA. J Clin Virol [Internet]. 2003;27(2):136–45.
- 474 47. Attig F, Spitzbarth I, Kalkuhl A, Deschl U, Puff C, Baumgärtner W, et al. Reactive  
475 oxygen species are key mediators of demyelination in canine distemper  
476 leukoencephalitis but not in theiler's murine encephalomyelitis. Int J Mol Sci.  
477 2019;20(13).
- 478 48. Niedrig M, Klockmann U, Lang W, Roeder J, Burk S, DModrow S, et al. Monoclonal  
479 antibodies directed against tick-borne encephalitis virus with neutralizing activity in  
480 vivo. Acta Virol [Internet]. 1994;38:141–9.

481

## 482 **Figure legends**

483 **Figure1.** Low-virulent LGTV (TP21) and naturally avirulent TBEV (TBEV- 280)  
484 immunization protects mice from highly pathogenic TBEV (TBEV-Hypr) challenge. **(A)**  
485 Schematic representation of the study. **(B)** Changes in body weight and the survival of the mice  
486 post TBEV-Hypr challenge was monitored for a period of 14 days. Data is presented as mean  
487  $\pm$  SD (n=10) of percentage change relative to initial body weight on the day of TBEV-Hypr  
488 challenge. Body weight data was analysed using unpaired students t-test and survival data  
489 analysed by log-rank test (\*\* p< 0.01, \*\*\*\* p< 0.0001).

490 **Figure 2.** TBEV distribution in the periphery and in the CNS. **(A)** qPCR analysis of viral RNA  
491 isolated from the spleen and brain of mock, TP21 and TBEV-280 immunized mice. RNA copies  
492 per gram tissue were determined and data obtained from individual mice were plotted, bars  
493 indicate median (n=10; \*\*\*\*p < 0.0001) **(B)**. Tissue sections were stained with antibody  
494 targeting TBEV E-protein (green) and Hoechst (nuclei, blue) and virus antigen distribution in  
495 brain of mock immunized mice was scored based on the frequency of infected cells in the HPF  
496 analyzed (n=6). Representative immunofluorescence images from cerebral cortex (left panels)

497 and hippocampus (right panels) regions from mock immunized (C) TP21 immunized (D) and  
498 TBEV-280 immunized (E) mice infected with TBEV-Hypr are depicted here. Scale bars 50µm.

499 **Figure 3.** Immunofluorescence determined the cellular targets of TBEV infection in brain.  
500 Brain slices were stained using antibody targeting TBEV E-protein (green) and Hoechst (nuclei,  
501 blue). Representative images from thalamus (A) and cerebellum (B) show infected cells that  
502 morphologically resemble neurons. Double labeling of TBEV E-protein (green) and glial  
503 fibrillary acid protein (GFAP, astrocytes; red) of hypothalamus (C) and cerebral cortex (D)  
504 shows no colocalization of TBEV antigen with astrocytes. Co-stainings with anti-Iba-1  
505 (microglia/macrophages marker; red) and TBEV E-protein (green) show mostly uninfected  
506 microglia/macrophages. However, few Iba-1<sup>+</sup> TBEV<sup>+</sup> cells detected in the midbrain (E) and  
507 thalamus (F) of mock immunized and TBEV-Hypr infected mice. Scale bars 50µm.

508 **Figure 4.** Assessment of neuronal damage in brain following TBEV-Hypr challenge.  
509 Representative images of HE staining from olfactory bulb (A) and thalamus (B) of mock  
510 immunized and TBEV-Hypr infected mice demonstrating neuronal necrosis (thin arrows),  
511 inflammation (arrow heads), cellular debris/ pyknotic nuclei (thick arrows) and gliosis (star)  
512 are shown here; Scale bars 50µm. (C) Neuronal necrosis in different regions of brain of mock,  
513 TP21 and TBEV-280 immunized and TBEV-Hypr infected mice (n=6) have been scored on a  
514 scale of 0 to 3 (see methods) and presented here (\*p < 0.05, \*\*p < 0.01).

515 **Figure 5.** Inflammation in the brain. Regions with perivascular infiltrates (PVI) were assessed  
516 using HE staining. PVI (arrow heads) were not only detected in mock (A) but also in TP21 (B)  
517 and TBEV-280 (C) immunized mice that were subjected to TBEV-Hypr challenge; scale bars  
518 50µm. (D). High power fields from different regions of brain of mock, TP21 and TBEV-280  
519 immunized mice (n=6) were screened and the score (see methods) obtained for PVI from  
520 individual mice was plotted here. (\*p < 0.05; \*\*p < 0.01).

521 **Figure 6.** Reactive changes in the brain following TBEV-Hypr challenge. Gliosis (star) was  
522 detected in the brain of mock (A) TP21 (B) and TBEV-280 (C) immunized mice that were  
523 subjected to TBEV-Hypr challenge; scale bars 50µm. (D) Gliosis was scored on a scale of 0 to  
524 3 (see methods) by screening HPF from different brain regions of mock, TP21 and TBEV-280  
525 immunized mice (n=6; \*p < 0.05).

526

### 527 **Supplementary information**

528 *Supplementary Figure S1.* Taq-Man qPCR analysis of the spinal cord of mock, TP21 and  
529 TBEV-280 immunized mice that were infected with TBEV-Hypr.

530 *Supplementary Figure S2.* Evaluation of neuronal necrosis by HE staining in other brain  
531 regions. Regions were scored from 0 to 3 (see methods) and statistical analyzed by Mann-  
532 Whitney test (\*p < 0.05; n=6/group).

533 *Supplementary Figure S3.* Evaluation of inflammation using HE staining in different brain  
534 regions. Regions were scored from 0 to 3 (see methods) and statistical analyzed by Mann-  
535 Whitney test (\*p < 0.05; n=6/group).

536 *Supplementary Figure S4.* Evaluation of gliosis using HE staining in different brain regions.  
537 Regions were scored from 0 to 3 (see methods) and statistical analyzed by Mann-Whitney test  
538 (\*p < 0.05; n=6/group).

|       |                                                   |
|-------|---------------------------------------------------|
| CNS   | Central nervous system                            |
| dpi   | Days post infection                               |
| EMEM  | Eagle's Minimum Essential medium                  |
| GFAP  | Glial fibrillary acidic protein marker            |
| HE    | Haematoxylin and eosin staining                   |
| HPF   | High power fields                                 |
| Iba-1 | Ionized calcium binding adaptor molecule 1 marker |
| IHC   | Immunohistochemistry                              |
| LAV   | Live-attenuated vaccine                           |
| LGTV  | Langkat virus                                     |

|      |                               |
|------|-------------------------------|
| pfu  | Plaque-forming unit           |
| PVI  | Perivascular infiltrates      |
| qPCR | Quantitative real-time PCR    |
| s.c. | Subcutaneous                  |
| TBE  | Tick-borne encephalitis       |
| TBEV | Tick-borne encephalitis virus |
| ZIKV | Zika virus                    |

539 **Abbreviations**

Figure 1.

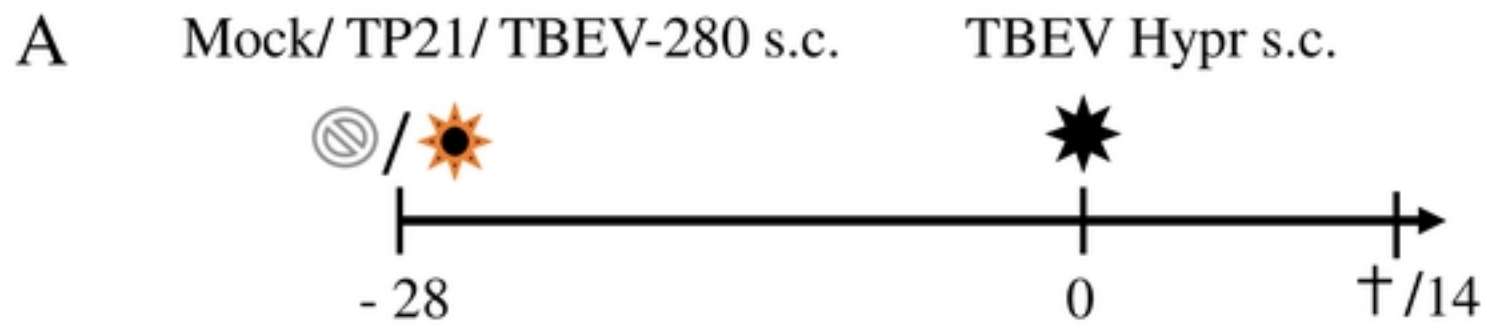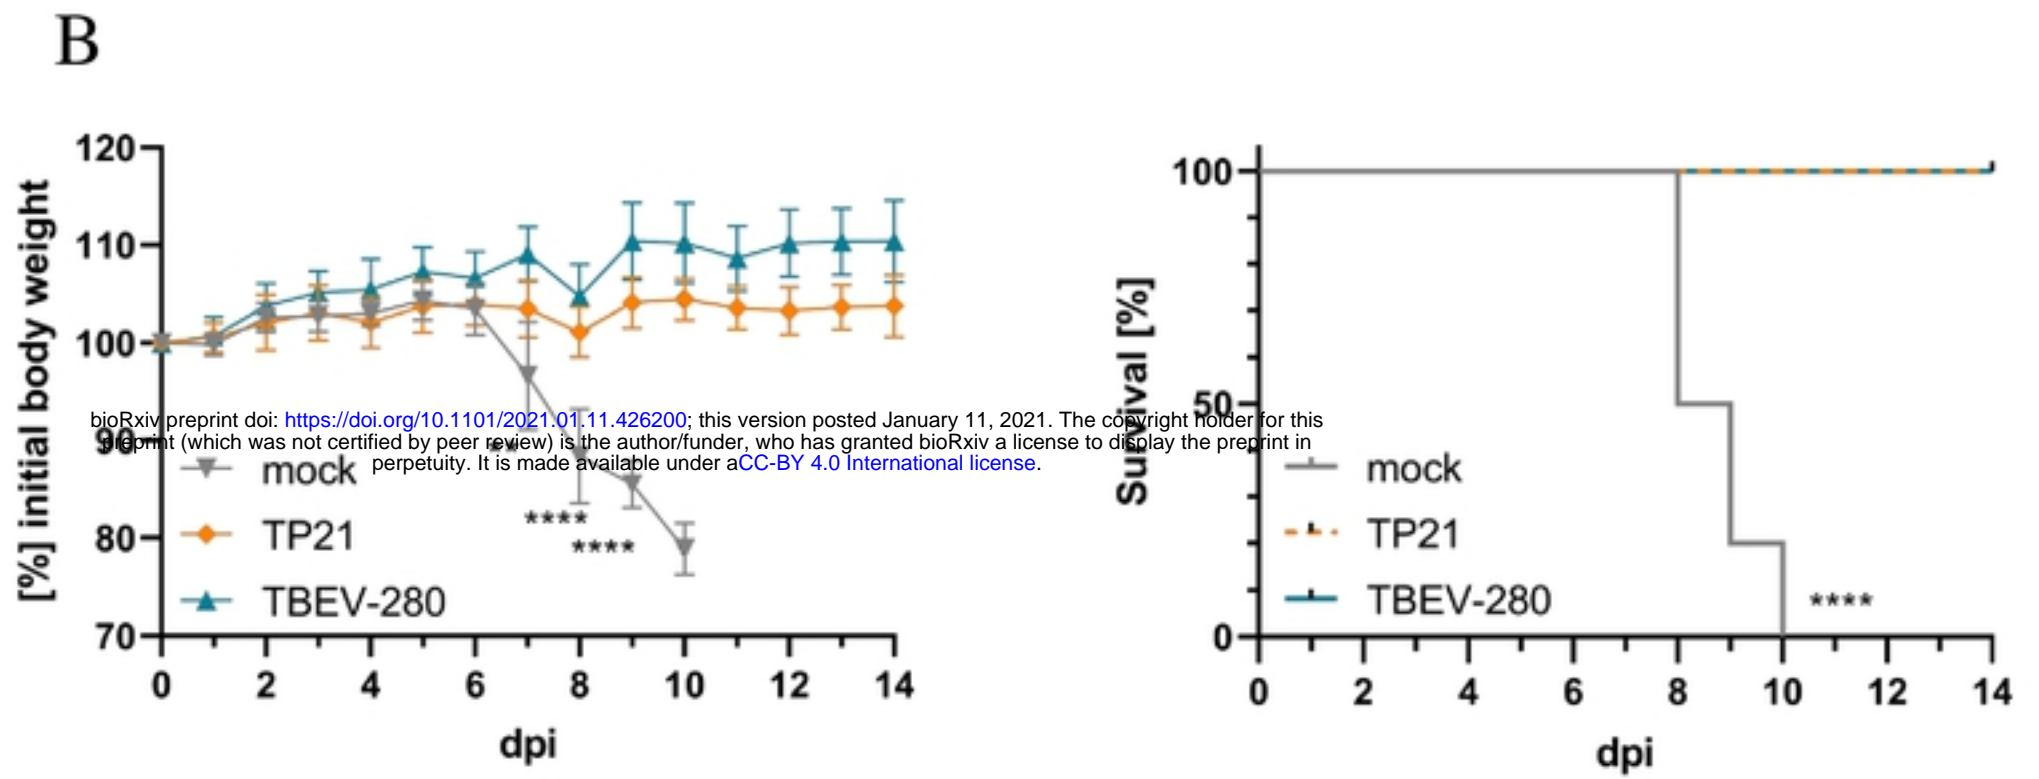

Figure 2.

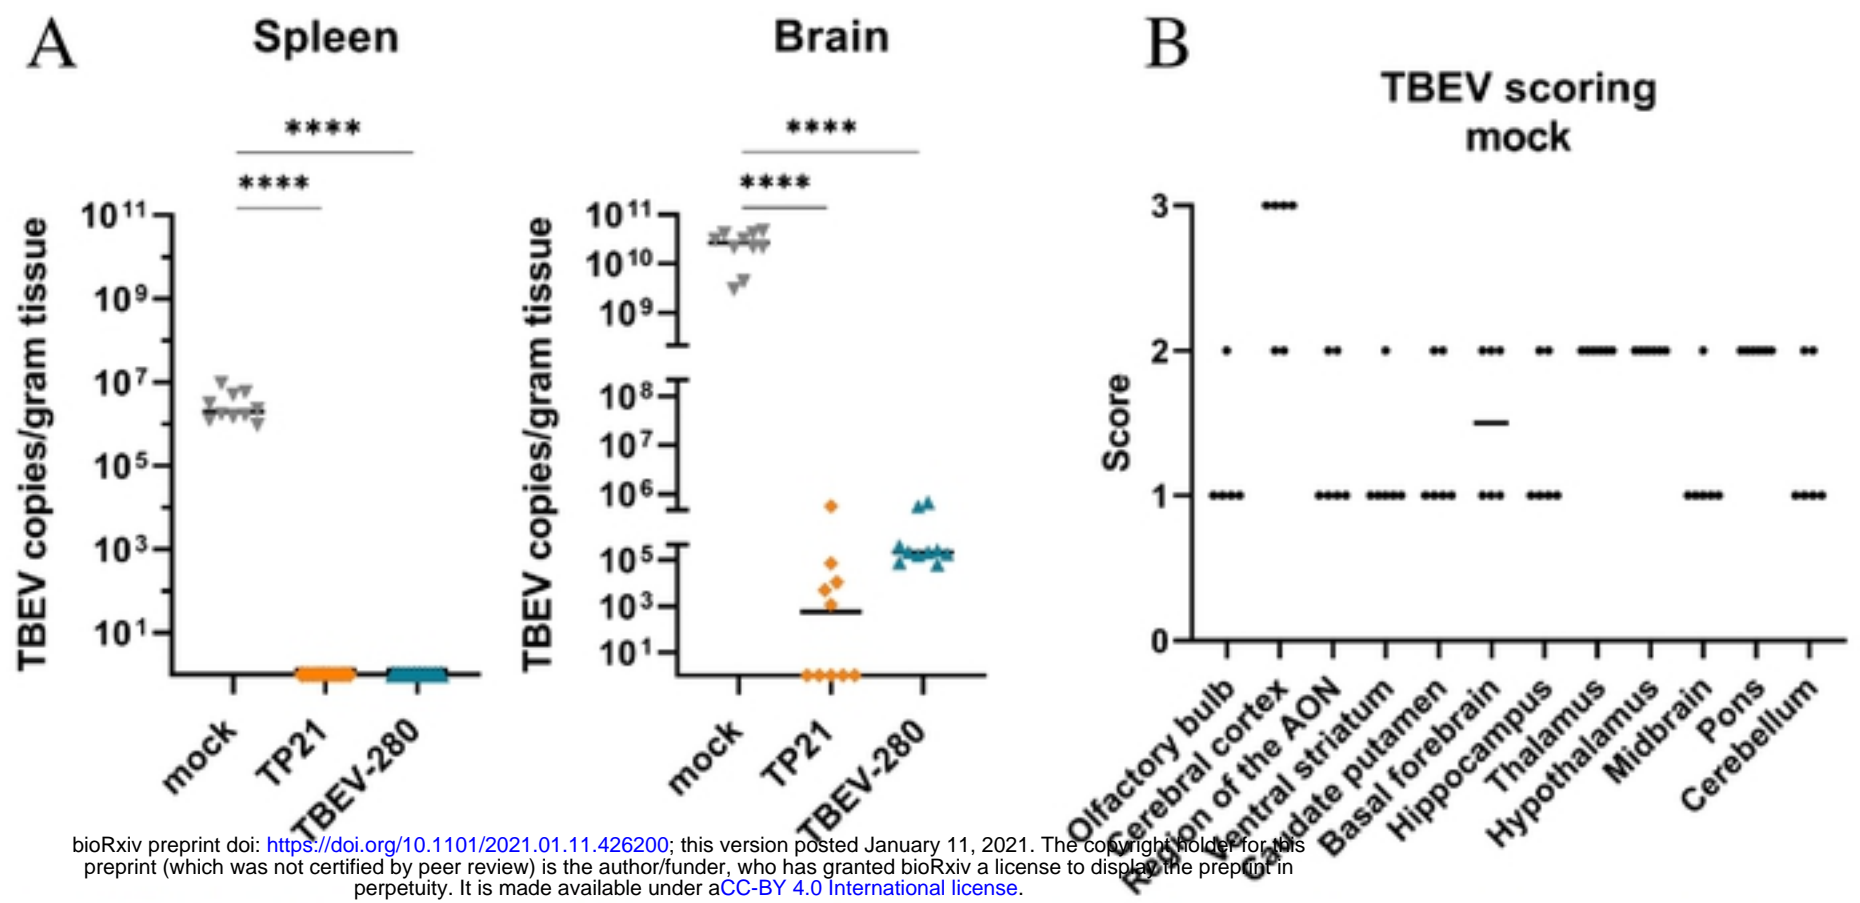

bioRxiv preprint doi: <https://doi.org/10.1101/2021.01.11.426200>; this version posted January 11, 2021. The copyright holder for this preprint (which was not certified by peer review) is the author/funder, who has granted bioRxiv a license to display the preprint in perpetuity. It is made available under aCC-BY 4.0 International license.

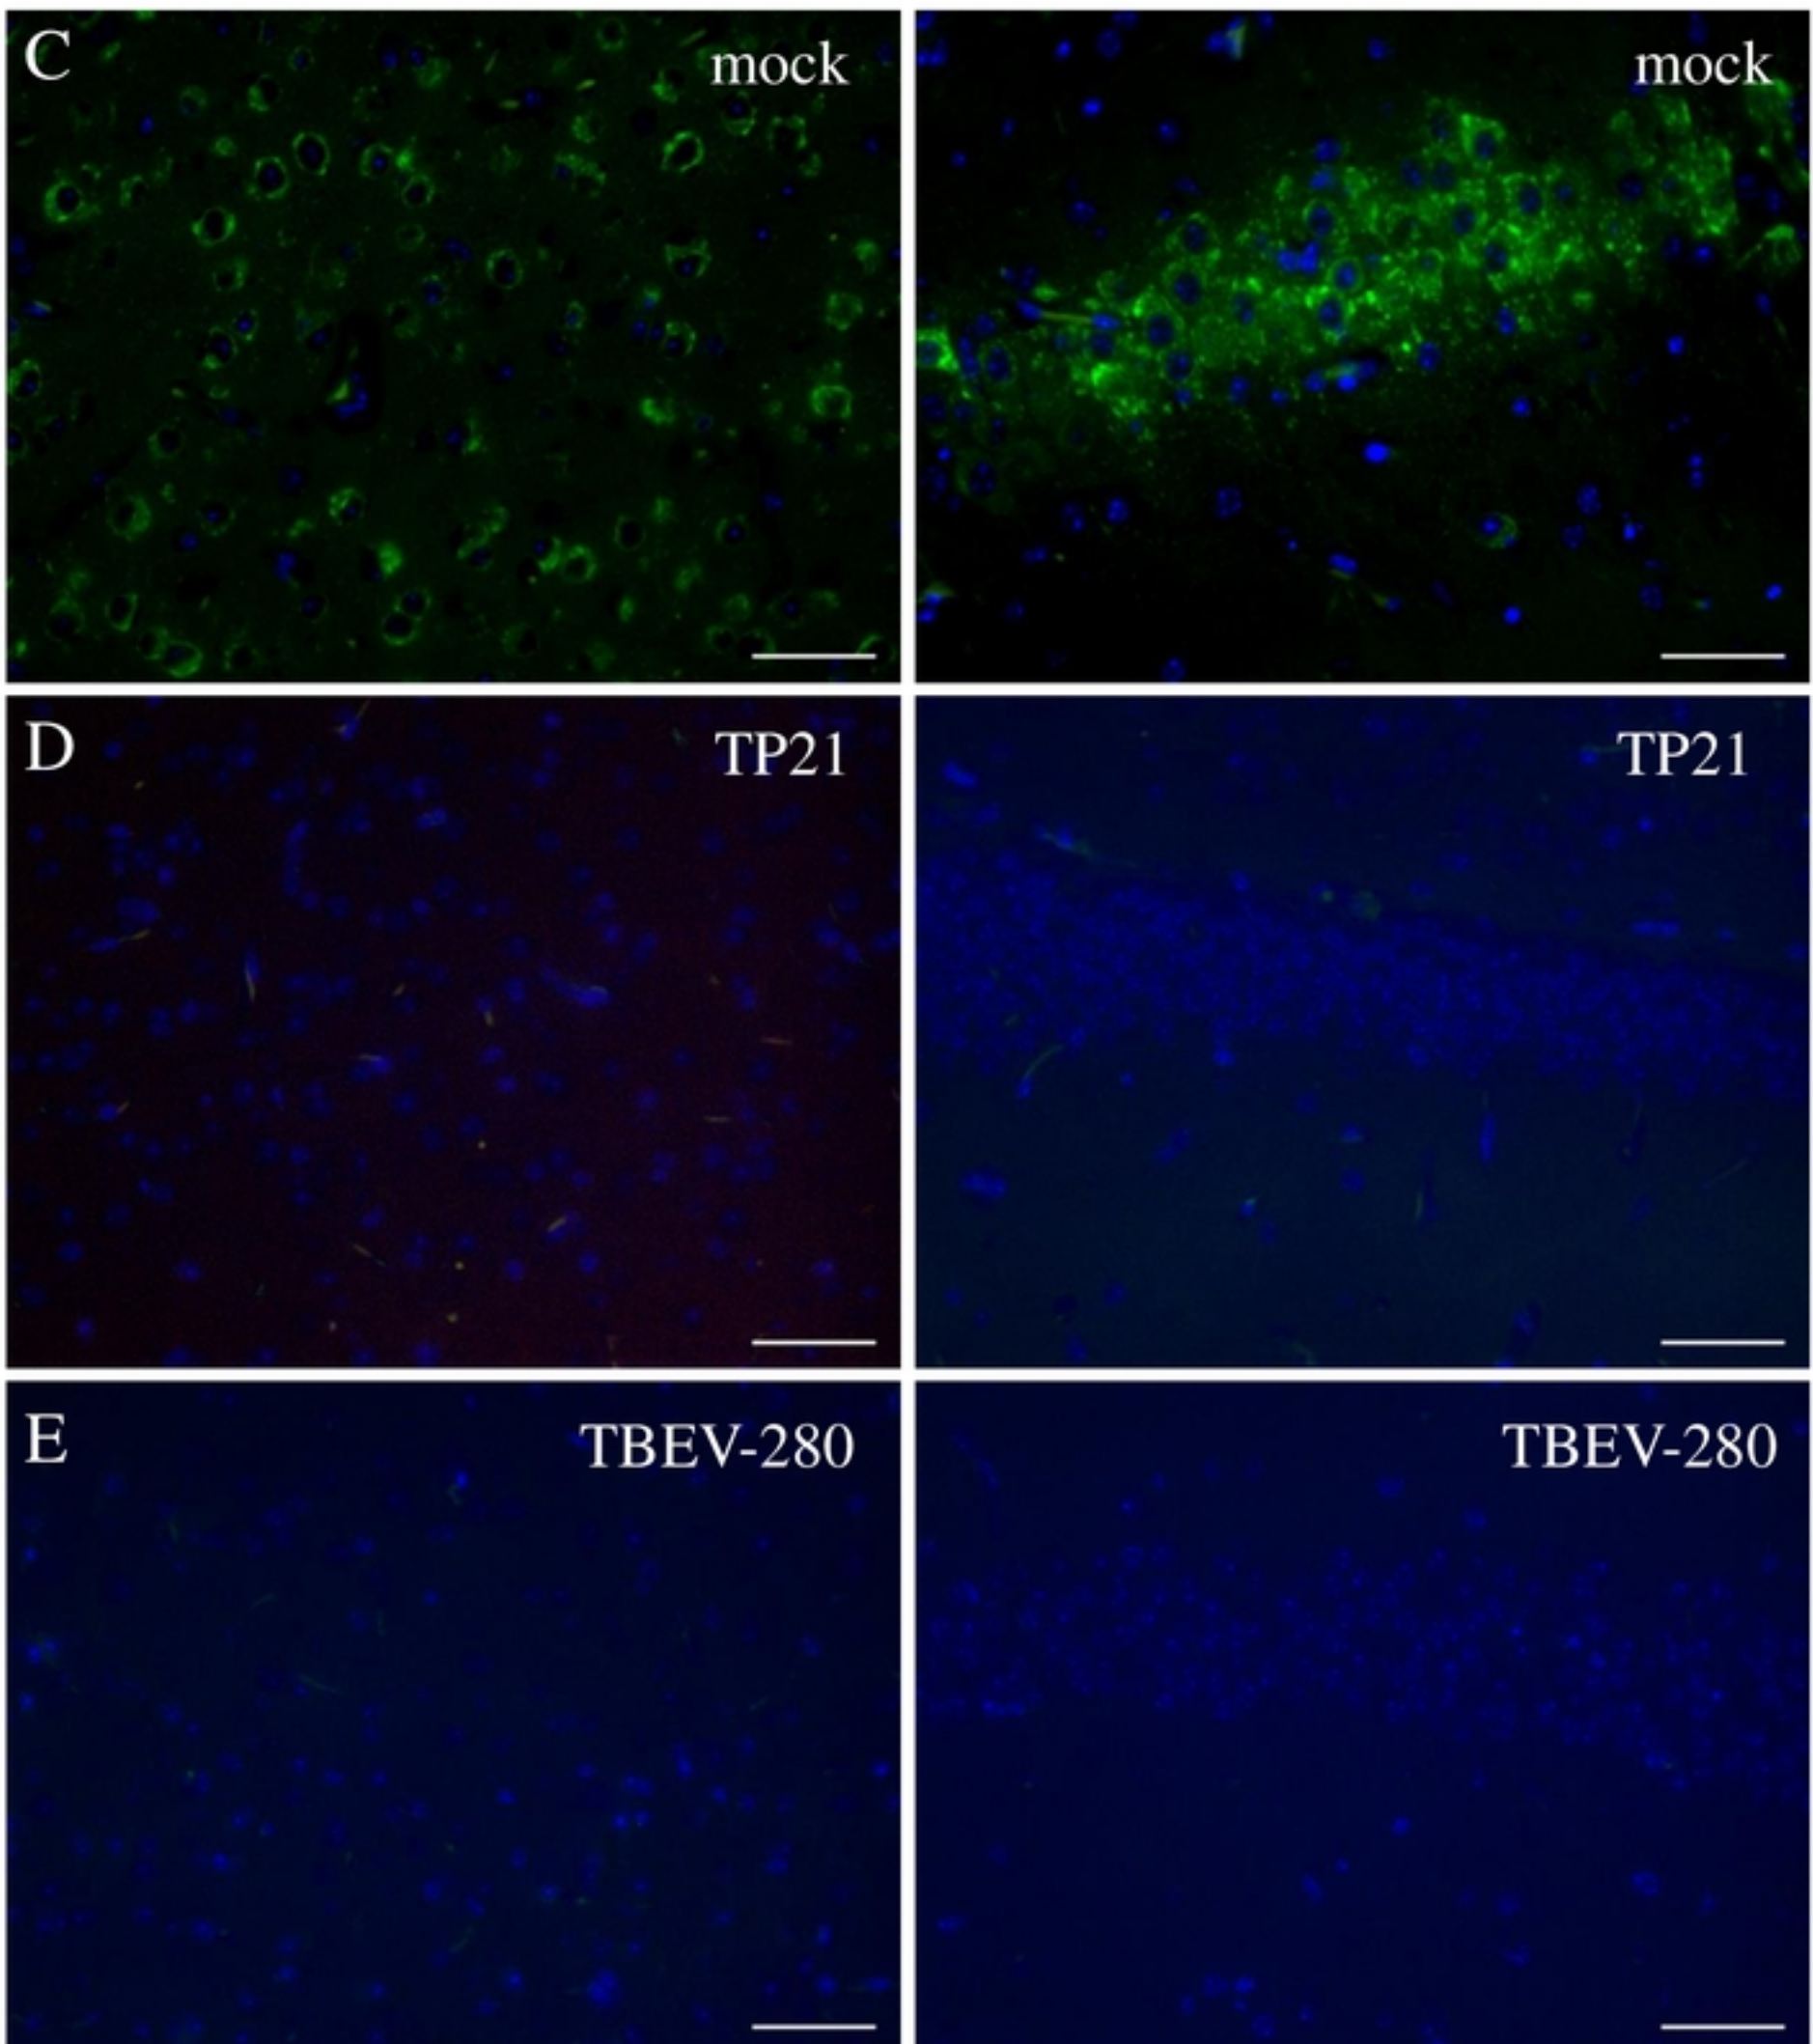

Figure 3.

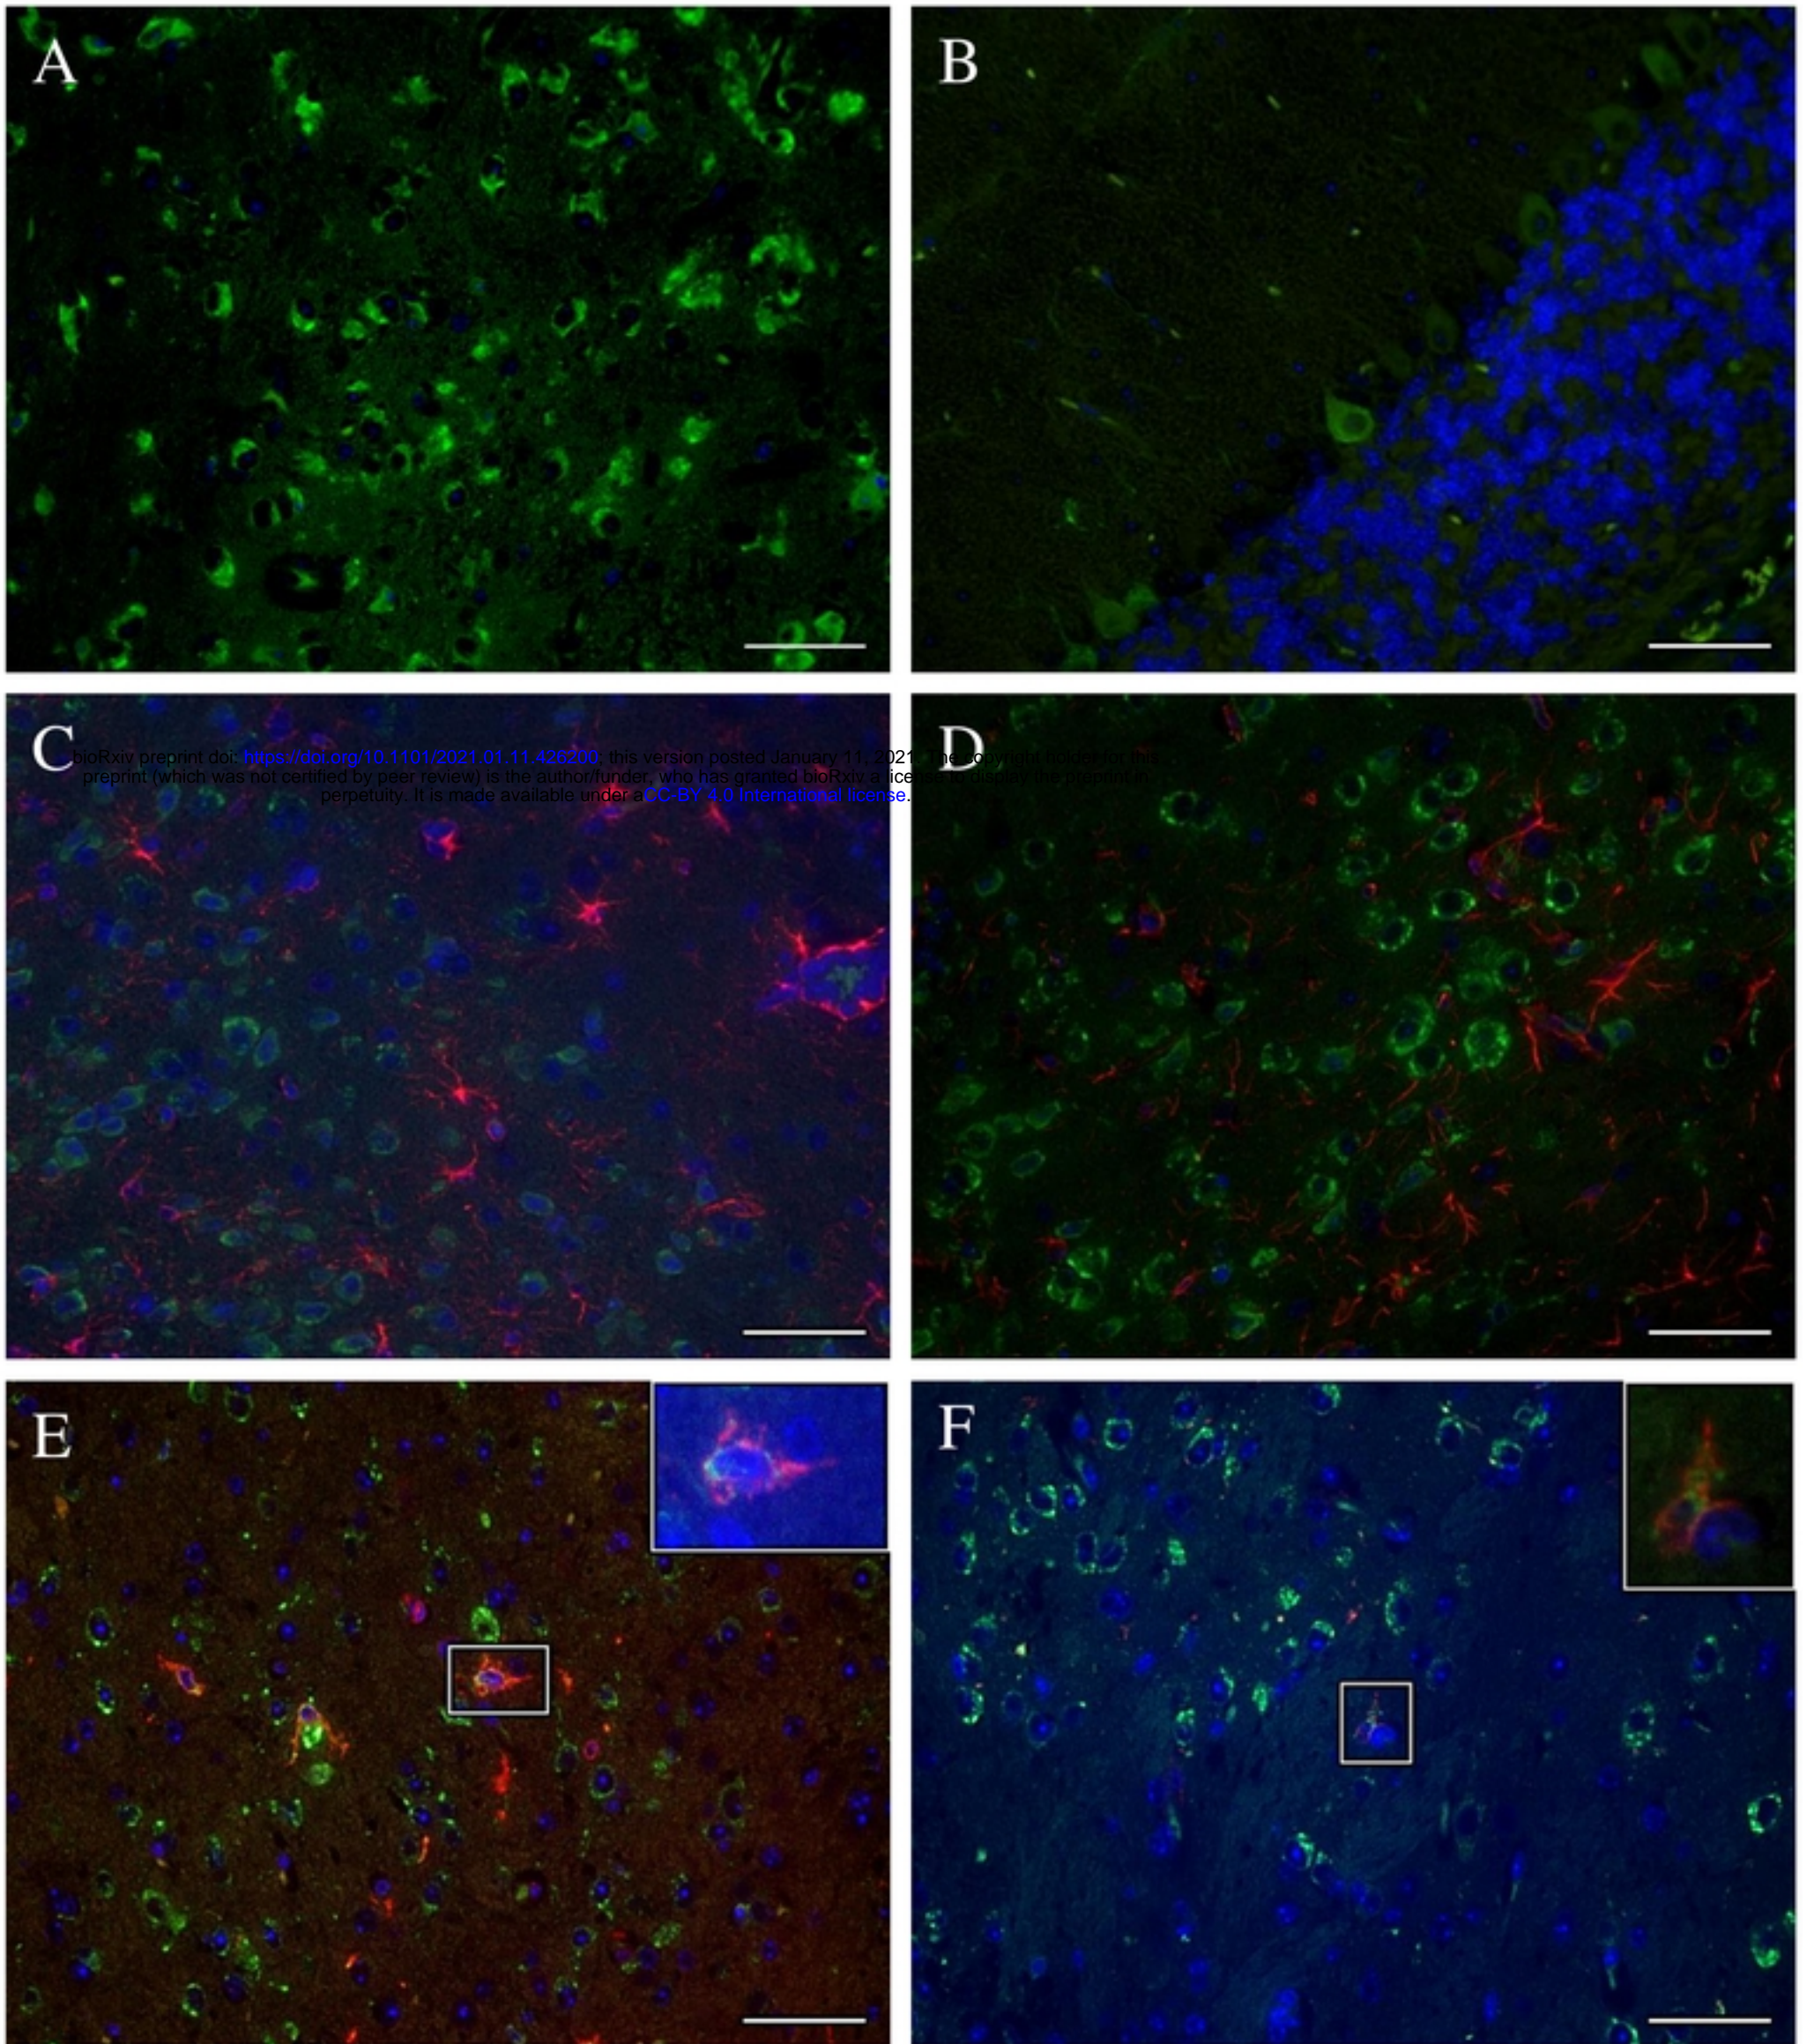





Figure 5.

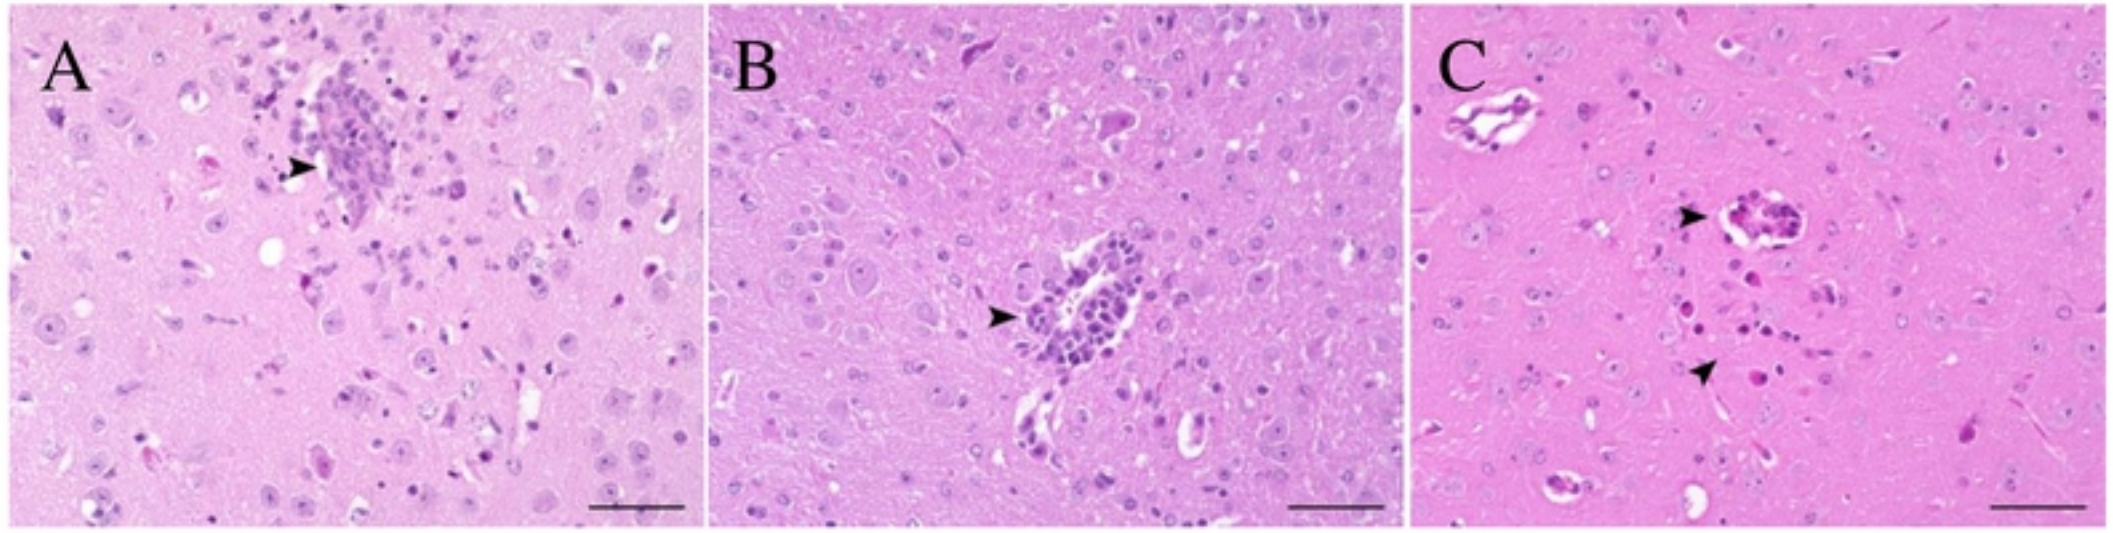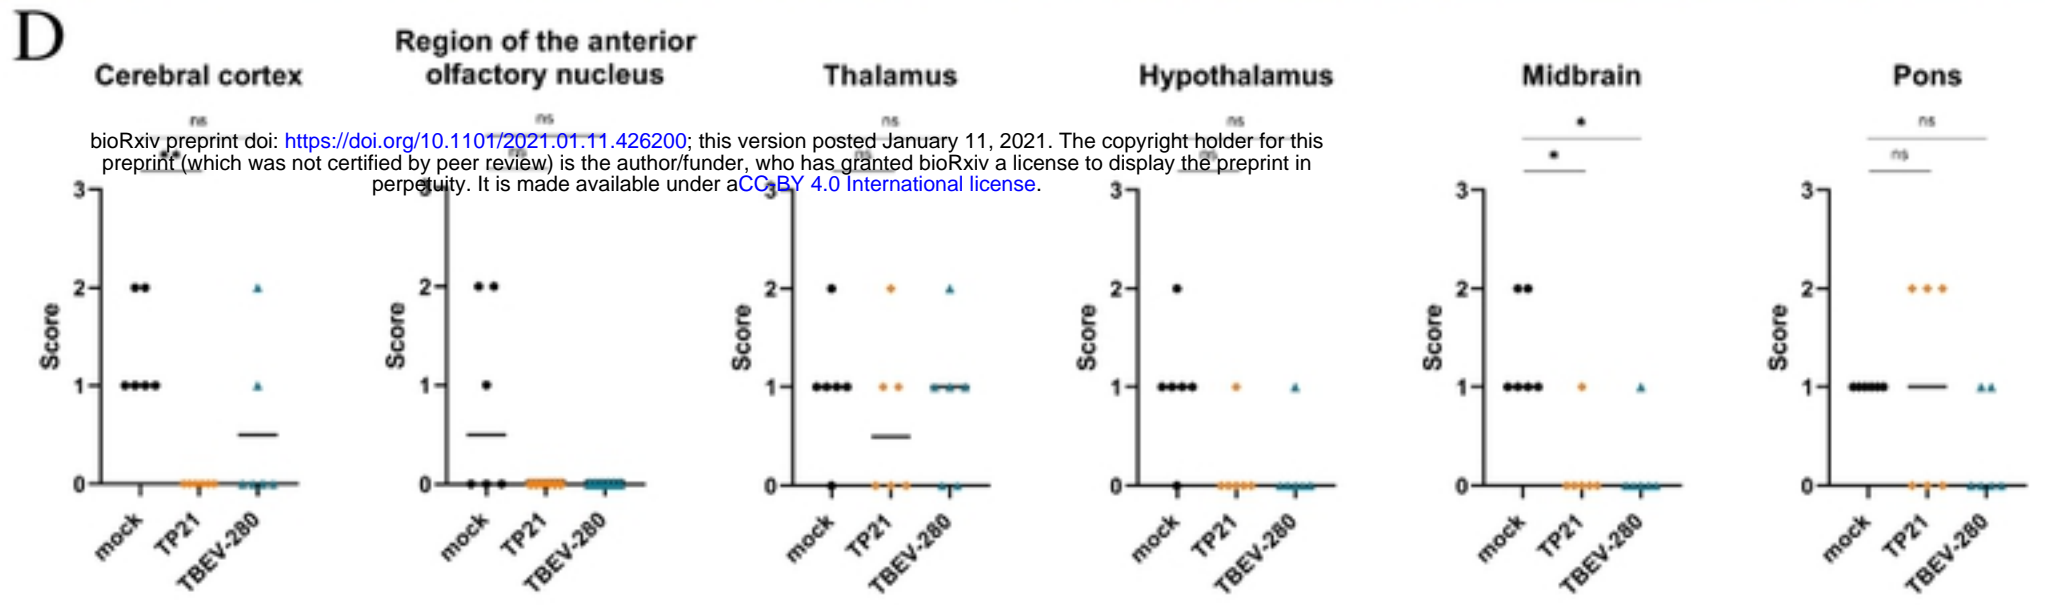

Source: https://www.biorxiv.org/content/10.1101/2021.01.11.426200v1.full.pdf
